# Supplementary material
Source: Springer Nature journal article supplement (https://www.springermedizin.de/resource/supplementary/12889_2007_1172_MOESM3_ESM.pdf/9502612)
Supplement: MOESM3 [file 9502612]

## **Socioeconomic level**

### ***Family material resources (Block 1)***

Family income:  $\leq 1$  minimum wage vs 1 or more minimum wage

Father's income: none vs any

Family purchasing power: Low if no basic electronic items at home; Regular if 3 or fewer ; Good  $> 3$  basic electronic items

---

### ***Family Status (Block 2)***

Maternal literacy: none or  $\leq 5$  years schooling vs. 6 years or more

Family type: nuclear vs extended

Religion: Catholic vs. other

Paternal contact with the child: Yes vs. no

CIDI carers' lifetime mood disorder diagnosis (F32 to F34 CID 10) following a standard algorithm (yes vs. no).

---

## **Physical & psychosocial environment level**

### ***Physical environment (Block 3)***

Sanitary conditions at household level (composed by water supply, sewage disposal and people per room), Pessimas, vs. Bad and vs. Good conditions. Sanitary conditions at neighbourhood level (housing type, paving, water supply, sewage disposal, drainage and solid waste) Bad vs.

Regular and vs. Good [43].

### ***Psychosocial stimulation (Block 4)***

HOME score : number of points scored : variable used in its continuous form

Pre- school attendance: ever attending vs. not

---

## **Child characteristics and health level**

### ***Individual characteristics (Block 5)***

Birth order: First to second vs. third or later

Sex and age

### ***Nutritional status and infection (block 6):***

Birth weight below 2500kg vs. 2500kg or above. Three anthropometric indices being used (weight-for-age, height-for-age and weight-for-height) with severe/moderate, mild malnutrition and eutrophy defined as  $\leq -2$ ,  $-2$  to  $< -1$ , and  $\geq -1$  z-scores of the NCHS reference data. In the stool examination infection with one of the following parasites: *Ascaris lumbricoides*, *Trichuris trichiura*, hookworm ou *Giardia duodenali*; A score was built with four levels: no infection; infection with one parasite ; infection with two parasites; and infection with 3 parasites.

***Longitudinal prevalence of diarrhoea during 1997-99 follow-up*** (0-6 vs. 6 or more days/year)

## **Main outcome**

***WPPSI-R score*** (used in its continuous form).
